# Supplementary material for: Determination and Metabolite Profiling of Mixtures of Triterpenoid Saponins from Seeds of Chilean Quinoa (Chenopodium quinoa) Germplasm
Source: MDPI journal article supplement (doi:10.3390/agronomy11091867), 2021-09-17
Supplement: s1 [file s1]

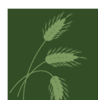

## Supplementary or supporting materials

**Table S1.** Total saponin content (mg/g) in *C. quinoa* lines. Table shows the total saponin content and individual sapogenins in *C. quinoa* seeds. Data are presented here as mean  $\pm$  standard deviation (SD) values of independent sample extractions ( $n = 4$ ). A one-way analysis of variance ANOVA was performed and  $p$ -value  $< 0.05$  was considered as a statistically significant difference. A significant difference was found ( $p < 0.001$ ) in relative saponin content. Significant codes: '\*\*\*' 0.001 '\*\*' 0.01 '\*' 0.05 '.' 0.1 '' 1 OA: oleanolic acid, HD: hederagenin, PA: phytolaccagenic acid.

| Quinoa line | OA              |     | HD              |     | PA              |     | Total Saponins   |     |
|-------------|-----------------|-----|-----------------|-----|-----------------|-----|------------------|-----|
| AZ-1        | 3.01 $\pm$ 0.14 | *** | 2.55 $\pm$ 0.13 | *** | ND              |     | 5.56 $\pm$ 0.24  | *** |
| AZ-2        | NA              |     | NA              |     | NA              |     | NA               |     |
| AZ-3        | 4.37 $\pm$ 0.13 | *** | 2.99 $\pm$ 0.05 | *** | 4.95 $\pm$ 0.22 | *** | 12.32 $\pm$ 0.37 | *** |
| AZ-4        | 3.21 $\pm$ 0.10 |     | 2.98 $\pm$ 0.05 | *** | 3.05 $\pm$ 0.14 | *** | 9.25 $\pm$ 0.16  | *** |
| AZ-5        | 2.57 $\pm$ 0.36 | **  | 2.83 $\pm$ 0.38 | *   | ND              |     | 5.41 $\pm$ 0.73  |     |
| AZ-6        | 0.99 $\pm$ 0.11 | *** | 1.74 $\pm$ 0.31 | *** | 2.81 $\pm$ 0.55 |     | 5.54 $\pm$ 0.94  |     |
| AZ-7        | 3.07 $\pm$ 0.46 |     | 2.35 $\pm$ 0.25 | .   | 5.05 $\pm$ 0.53 | *** | 10.47 $\pm$ 1.23 | *** |
| AZ-8        | 2.45 $\pm$ 0.62 | *** | 2.76 $\pm$ 0.58 | .   | 2.20 $\pm$ 0.48 | *** | 7.41 $\pm$ 1.68  | *** |
| AZ-9        | 2.94 $\pm$ 0.21 |     | 1.76 $\pm$ 0.10 | *** | 3.08 $\pm$ 0.25 | *** | 7.79 $\pm$ 0.54  | *** |
| AZ-10       | 1.59 $\pm$ 0.12 | *** | 1.34 $\pm$ 0.10 | *** | 1.84 $\pm$ 0.14 | *** | 4.78 $\pm$ 0.35  | *   |
| AZ-11       | 3.15 $\pm$ 0.05 |     | 4.01 $\pm$ 0.21 | *** | 4.63 $\pm$ 0.18 | *** | 11.80 $\pm$ 0.43 | *** |
| AZ-12       | 2.71 $\pm$ 0.26 | *   | 2.34 $\pm$ 0.19 | .   | 3.48 $\pm$ 0.14 | *** | 8.55 $\pm$ 0.60  | *** |
| AZ-13       | 2.87 $\pm$ 0.17 |     | 1.20 $\pm$ 0.04 | *** | 1.78 $\pm$ 0.10 | *** | 5.86 $\pm$ 0.32  |     |
| AZ-14       | 2.00 $\pm$ 0.05 | *** | 1.69 $\pm$ 0.03 | *** | 3.04 $\pm$ 0.14 | *** | 6.74 $\pm$ 0.16  | **  |
| AZ-15       | 2.66 $\pm$ 0.08 | *   | 2.42 $\pm$ 0.06 |     | 3.81 $\pm$ 0.13 | *** | 8.90 $\pm$ 0.27  | *** |
| AZ-16       | 2.15 $\pm$ 0.11 | *** | 1.98 $\pm$ 0.07 | *** | 3.00 $\pm$ 0.17 | *** | 7.14 $\pm$ 0.32  | *** |
| AZ-17       | 0.99 $\pm$ 0.07 | *** | 1.18 $\pm$ 0.06 | *** | 2.24 $\pm$ 0.05 | *** | 4.42 $\pm$ 0.18  | **  |
| AZ-18       | 1.71 $\pm$ 0.17 | *** | 1.49 $\pm$ 0.10 | *** | 2.02 $\pm$ 0.05 | *** | 5.23 $\pm$ 0.23  |     |
| AZ-19       | 2.10 $\pm$ 0.11 | *** | 1.96 $\pm$ 0.06 | *** | 2.29 $\pm$ 0.10 | *** | 6.35 $\pm$ 0.25  | *   |
| AZ-20       | 1.60 $\pm$ 0.08 | *** | 2.42 $\pm$ 0.16 |     | 2.69 $\pm$ 0.14 | *** | 6.72 $\pm$ 0.38  | **  |
| AZ-21       | 1.86 $\pm$ 0.07 | *** | 2.02 $\pm$ 0.04 | *** | 2.91 $\pm$ 0.03 | *** | 6.80 $\pm$ 0.10  | **  |
| AZ-22       | 1.66 $\pm$ 0.14 | *** | 1.64 $\pm$ 0.16 | *** | 2.72 $\pm$ 0.29 | *** | 6.03 $\pm$ 0.59  |     |
| AZ-23       | 1.84 $\pm$ 0.04 | *** | 1.33 $\pm$ 0.15 | *** | 2.15 $\pm$ 0.16 | *** | 5.33 $\pm$ 0.32  |     |
| AZ-24       | 1.83 $\pm$ 0.06 | *** | 1.37 $\pm$ 0.08 | *** | 2.23 $\pm$ 0.27 | *** | 5.45 $\pm$ 0.35  |     |
| AZ-25       | 3.94 $\pm$ 0.15 | *** | 2.95 $\pm$ 0.12 | *** | 4.42 $\pm$ 0.30 | *** | 11.32 $\pm$ 0.53 | *** |
| AZ-26       | 2.61 $\pm$ 0.17 | **  | 2.17 $\pm$ 0.13 | *** | 4.62 $\pm$ 0.31 | *** | 9.42 $\pm$ 0.62  | *** |
| AZ-27       | 2.23 $\pm$ 0.04 | *** | 2.10 $\pm$ 0.02 | *** | 3.80 $\pm$ 0.03 | *** | 8.14 $\pm$ 0.05  | *** |
| AZ-29       | 3.54 $\pm$ 0.36 | *** | 2.40 $\pm$ 0.26 |     | 4.53 $\pm$ 0.15 | *** | 10.48 $\pm$ 0.78 | *** |
| AZ-30       | 3.18 $\pm$ 0.22 |     | 2.11 $\pm$ 0.09 | *** | 3.99 $\pm$ 0.25 | *** | 9.29 $\pm$ 0.57  | *** |
| AZ-31       | 1.63 $\pm$ 0.04 | *** | 1.51 $\pm$ 0.08 | *** | 2.05 $\pm$ 0.07 | *** | 5.20 $\pm$ 0.18  |     |
| AZ-32       | 1.76 $\pm$ 0.17 | *** | 1.51 $\pm$ 0.08 | *** | 2.18 $\pm$ 0.13 | *** | 5.46 $\pm$ 0.35  |     |
| AZ-33       | 1.98 $\pm$ 0.11 | *** | 1.79 $\pm$ 0.04 | *** | 2.08 $\pm$ 0.02 | *** | 5.85 $\pm$ 0.13  |     |
| AZ-34       | 2.64 $\pm$ 0.21 | **  | 2.09 $\pm$ 0.15 | *** | 3.37 $\pm$ 0.42 | *** | 8.11 $\pm$ 0.79  | *** |
| AZ-35       | 2.63 $\pm$ 0.03 | **  | 2.12 $\pm$ 0.01 | *** | 3.32 $\pm$ 0.11 | *** | 8.09 $\pm$ 0.14  | *** |
| AZ-36       | 2.25 $\pm$ 0.22 | *** | 1.75 $\pm$ 0.08 | *** | 2.94 $\pm$ 0.29 | *** | 6.95 $\pm$ 0.60  | *** |
| AZ-37       | 2.12 $\pm$ 0.07 | *** | 1.92 $\pm$ 0.06 | *** | 2.86 $\pm$ 0.04 | *** | 6.91 $\pm$ 0.12  | *** |
| AZ-38       | 2.28 $\pm$ 0.07 | *** | 2.53 $\pm$ 0.04 |     | ND              |     | 4.82 $\pm$ 0.11  | .   |
| AZ-39       | 2.05 $\pm$ 0.01 | *** | 2.03 $\pm$ 0.05 | *** | 2.76 $\pm$ 0.07 | *** | 6.85 $\pm$ 0.11  | **  |
| AZ-40       | 2.33 $\pm$ 0.06 | *** | 2.68 $\pm$ 0.08 | *** | ND              |     | 5.01 $\pm$ 0.12  |     |
| AZ-41       | 2.05 $\pm$ 0.19 | *** | 1.63 $\pm$ 0.05 |     | 2.45 $\pm$ 0.14 | *** | 6.15 $\pm$ 0.36  |     |
| AZ-42       | 1.61 $\pm$ 0.06 | *** | 1.44 $\pm$ 0.05 | *** | 2.32 $\pm$ 0.17 | *** | 5.38 $\pm$ 0.29  |     |

|       |             |     |             |     |             |     |              |     |
|-------|-------------|-----|-------------|-----|-------------|-----|--------------|-----|
| AZ-43 | 2.29 ± 0.22 | *** | 2.22 ± 0.18 | *** | ND          |     | 4.52 ± 0.41  | **  |
| AZ-44 | 1.88 ± 0.05 | *** | 1.70 ± 0.07 | **  | 2.76 ± 0.05 | *** | 6.35 ± 0.18  | *   |
| AZ-45 | 1.76 ± 0.12 | *** | 1.45 ± 0.08 | *** | 2.38 ± 0.14 | *** | 5.59 ± 0.35  |     |
| AZ-46 | 2.30 ± 0.04 | *** | 3.38 ± 0.08 | *** | 4.00 ± 0.09 | *** | 9.69 ± 0.22  | *** |
| AZ-47 | 2.10 ± 0.30 | *** | 1.73 ± 0.12 | *** | 2.88 ± 0.12 | *** | 6.72 ± 0.44  | **  |
| AZ-48 | 1.06 ± 0.01 | *** | 2.65 ± 0.07 | *** | 2.78 ± 0.07 | *** | 6.49 ± 0.16  | *   |
| AZ-49 | 1.10 ± 0.01 | *** | 2.89 ± 0.21 | **  | 2.89 ± 0.36 | *** | 6.88 ± 0.57  | *** |
| AZ-50 | 2.01 ± 0.09 | *** | 1.87 ± 0.05 |     | 3.25 ± 0.06 | *** | 7.14 ± 0.18  | *** |
| AZ-51 | 3.76 ± 0.88 | *** | 3.00 ± 0.69 | *** | 4.83 ± 1.22 | *** | 11.60 ± 2.80 | *** |
| AZ-52 | 4.49 ± 0.06 | *** | 3.24 ± 0.02 | *** | 5.51 ± 0.08 | *** | 13.25 ± 0.12 | *** |
| AZ-53 | 1.39 ± 0.04 | *** | 1.55 ± 0.09 | *** | 2.24 ± 0.06 | *** | 5.19 ± 0.17  |     |
| AZ-54 | 1.65 ± 0.09 | *** | 1.43 ± 0.04 | *** | 2.08 ± 0.04 | *** | 5.16 ± 0.18  |     |
| AZ-55 | 1.64 ± 0.06 | *** | 1.79 ± 0.06 | *** | 2.18 ± 0.05 | *** | 5.61 ± 0.15  |     |
| AZ-56 | 1.31 ± 0.05 | *** | 1.96 ± 0.09 | *** | 2.24 ± 0.12 | *** | 5.51 ± 0.25  |     |
| AZ-57 | 1.88 ± 0.03 | *** | 2.04 ± 0.15 | *** | ND          |     | 3.92 ± 0.18  | *** |
| AZ-58 | 1.96 ± 0.01 | *** | 1.75 ± 0.02 | *** | 1.91 ± 0.05 | *** | 5.63 ± 0.06  |     |
| AZ-59 | 1.89 ± 0.09 | *** | 1.92 ± 0.04 | *** | 2.44 ± 0.03 | *** | 6.25 ± 0.11  | .   |
| AZ-60 | 2.03 ± 0.03 | *** | 1.66 ± 0.04 | *** | 2.72 ± 0.04 | *** | 6.42 ± 0.10  | *   |
| AZ-61 | 2.34 ± 0.13 | *** | 1.68 ± 0.09 | *** | 2.32 ± 0.08 | *** | 6.35 ± 0.25  | *   |
| AZ-62 | 1.66 ± 0.04 | *** | 1.85 ± 0.07 | *** | 1.83 ± 0.06 | *** | 5.35 ± 0.17  |     |
| AZ-63 | 2.57 ± 0.02 | **  | 1.70 ± 0.05 | *** | 2.79 ± 0.03 | *** | 7.06 ± 0.06  | *** |
| AZ-64 | NA          |     | NA          |     | NA          |     | NA           |     |
| AZ-65 | 2.42 ± 0.18 | *** | 1.99 ± 0.17 | *** | 2.45 ± 0.16 | *** | 6.87 ± 0.51  | *** |
| AZ-66 | 1.77 ± 0.07 | *** | 1.69 ± 0.05 | *** | 2.35 ± 0.11 | *** | 5.82 ± 0.23  |     |
| AZ-67 | 3.22 ± 0.51 |     | 1.80 ± 0.18 | *** | 3.25 ± 0.43 | *** | 8.28 ± 1.12  | *** |
| AZ-68 | 2.99 ± 0.10 |     | 1.92 ± 0.03 | *** | 2.94 ± 0.08 | *** | 7.85 ± 0.15  | *** |
| AZ-69 | 1.61 ± 0.02 | *** | 1.36 ± 0.03 | *** | 2.42 ± 0.14 | *** | 5.40 ± 0.20  |     |
| AZ-70 | 1.26 ± 0.07 | *** | 1.32 ± 0.05 | *** | 2.35 ± 0.04 | *** | 4.94 ± 0.16  |     |
| AZ-71 | 2.45 ± 0.06 | *** | 1.54 ± 0.02 | *** | 2.55 ± 0.04 | *** | 6.54 ± 0.12  | *   |
| AZ-72 | 2.37 ± 0.09 | *** | 1.52 ± 0.02 | *** | 2.60 ± 0.07 | *** | 6.50 ± 0.16  | *   |
| AZ-73 | 1.86 ± 0.11 | *** | 1.34 ± 0.05 | *** | 2.26 ± 0.03 | *** | 5.47 ± 0.16  |     |
| AZ-74 | 2.05 ± 0.10 | *** | 3.10 ± 0.16 | *** | ND          |     | 5.16 ± 0.26  |     |
| AZ-76 | 2.07 ± 0.14 | *** | 3.30 ± 0.29 | *** | 0.85 ± 0.00 | *** | 6.24 ± 0.43  | .   |
| AZ-77 | 1.88 ± 0.15 | *** | 1.30 ± 0.07 | *** | 2.15 ± 0.05 | *** | 5.34 ± 0.26  |     |
| AZ-78 | 1.53 ± 0.11 | *** | 1.23 ± 0.04 | *** | 1.73 ± 0.03 | *** | 4.50 ± 0.19  | **  |
| AZ-79 | 0.96 ± 0.21 | *** | 0.97 ± 0.21 | *** | 2.79 ± 1.35 | *** | 4.73 ± 1.78  | *   |
| AZ-80 | 2.42 ± 0.24 | *** | 1.82 ± 0.11 | *** | 2.65 ± 0.15 | *** | 6.90 ± 0.51  | *** |
| AZ-81 | 2.60 ± 0.28 | **  | 1.87 ± 0.14 | *** | 2.25 ± 0.09 | *** | 6.73 ± 0.52  | **  |
| AZ-82 | 1.06 ± 0.00 | *** | 1.39 ± 0.02 | *** | 1.90 ± 0.06 | *** | 4.36 ± 0.08  | **  |
| AZ-83 | 1.54 ± 0.06 | *** | 1.50 ± 0.11 | *** | 2.57 ± 0.32 | *** | 5.62 ± 0.49  |     |
| AZ-84 | 1.48 ± 0.19 | *** | 1.20 ± 0.18 | *** | 2.13 ± 0.54 | *** | 4.82 ± 0.92  | .   |
| AZ-85 | 0.99 ± 0.05 | *** | 1.46 ± 0.06 | *** | 2.65 ± 0.10 | *** | 5.12 ± 0.20  |     |
| AZ-86 | 1.02 ± 0.02 | *** | 1.02 ± 0.01 | *** | 2.69 ± 0.09 | *** | 4.74 ± 0.13  | *   |
| AZ-87 | 0.78 ± 0.04 | *** | 1.08 ± 0.00 | *** | 3.16 ± 0.16 | *** | 5.03 ± 0.12  |     |
| AZ-88 | 1.87 ± 0.02 | *** | 2.18 ± 0.05 | *** | 3.64 ± 0.17 | *** | 7.70 ± 0.24  | *** |
| AZ-89 | 1.84 ± 0.24 | *** | 1.72 ± 0.23 | *** | 2.76 ± 0.44 | *** | 6.33 ± 0.92  | .   |
| AZ-91 | 1.78 ± 0.04 | *** | 1.12 ± 0.04 | *** | 2.45 ± 0.09 | *** | 5.35 ± 0.16  |     |
| AZ-92 | NA          |     | NA          |     | NA          |     | NA           |     |
| AZ-93 | 1.92 ± 0.03 | *** | 1.10 ± 0.02 | *** | 3.04 ± 0.16 | *** | 6.07 ± 0.20  |     |
| AZ-94 | 2.46 ± 0.07 | *** | 1.45 ± 0.02 | *** | 1.89 ± 0.06 | *** | 5.81 ± 0.11  |     |
| AZ-95 | 2.53 ± 0.07 | *** | 0.88 ± 0.00 | *** | 2.20 ± 0.08 | *** | 5.63 ± 0.06  |     |

|        |             |     |             |     |             |     |              |     |
|--------|-------------|-----|-------------|-----|-------------|-----|--------------|-----|
| AZ-96  | 2.91 ± 0.22 |     | 0.88 ± 0.02 | *** | 2.13 ± 0.04 | *** | 5.93 ± 0.29  |     |
| AZ-97  | 1.00 ± 0.05 | *** | 1.31 ± 0.05 | *** | 3.22 ± 0.11 | *** | 5.54 ± 0.22  |     |
| AZ-98  | 1.56 ± 0.18 | *** | 1.79 ± 0.17 | *** | 3.43 ± 0.21 | *** | 6.79 ± 0.50  |     |
| AZ-99  | 1.39 ± 0.25 | *** | 1.03 ± 0.12 | *** | 1.91 ± 0.36 | *** | 4.33 ± 0.74  |     |
| AZ-100 | NA          |     | NA          |     | NA          |     | NA           |     |
| AZ-101 | 1.43 ± 0.25 | *** | 1.26 ± 0.18 | *** | 1.08 ± 0.10 | *** | 3.78 ± 0.54  | *** |
| AZ-102 | 0.99 ± 0.11 | *** | 0.89 ± 0.05 | *** | 0.97 ± 0.04 | *** | 2.85 ± 0.21  | *** |
| AZ-103 | 1.56 ± 0.20 | *** | 0.95 ± 0.06 | *** | 1.57 ± 0.17 | *** | 4.08 ± 0.43  | *** |
| AZ-104 | 2.96 ± 0.35 |     | 1.94 ± 0.17 | *** | 2.78 ± 0.30 | *** | 7.69 ± 0.83  | *** |
| AZ-105 | 1.78 ± 0.37 | *** | 2.04 ± 0.51 | *** | 1.47 ± 0.27 | *** | 5.30 ± 1.16  |     |
| AZ-107 | 2.69 ± 0.13 | *   | 1.84 ± 0.05 | *** | 3.05 ± 0.22 | *** | 7.59 ± 0.40  | *** |
| AZ-108 | 2.80 ± 0.10 |     | 2.05 ± 0.04 | *** | 2.81 ± 0.12 | *** | 7.67 ± 0.25  | *** |
| AZ-110 | 2.37 ± 0.28 | *** | 0.91 ± 0.06 | *** | 3.06 ± 0.13 | *** | 6.34 ± 0.46  | *   |
| AZ-111 | 3.84 ± 0.32 | *** | 1.86 ± 0.13 | *** | 2.66 ± 0.23 | *** | 8.37 ± 0.68  | *** |
| AZ-112 | 2.47 ± 0.05 | *** | 0.76 ± 0.01 | *** | 2.11 ± 0.05 | *** | 5.35 ± 0.12  |     |
| AZ-113 | 3.39 ± 0.14 | **  | 1.79 ± 0.04 | *** | 3.16 ± 0.17 | *** | 8.35 ± 0.30  | *** |
| AZ-114 | 3.28 ± 0.13 | *   | 1.95 ± 0.04 | *** | 2.81 ± 0.08 | *** | 8.05 ± 0.25  | *** |
| AZ-115 | 2.07 ± 0.12 | *** | 2.52 ± 0.15 |     | 4.79 ± 0.39 | *** | 9.39 ± 0.66  | *** |
| AZ-129 | 5.10 ± 0.08 | *** | 3.68 ± 0.15 | *** | 5.21 ± 0.27 | *** | 14.00 ± 0.50 | *** |
| Cq-1   | 2.13 ± 0.24 | *   | 2.28 ± 0.27 |     | 2.07 ± 0.25 | *** | 6.49 ± 0.76  | *   |
| Cq-2   | 3.96 ± 0.02 | *   | 3.31 ± 0.03 | **  | 7.76 ± 0.11 | *** | 15.04 ± 0.17 | *** |
| Cq-3   | 0.12 ± 0.00 | *** | 0.05 ± 0.00 | *** | 0.04 ± 0.00 |     | 0.22 ± 0.006 | *** |

**Table S2.** Tukey's–HSD multiple comparisons for saponin content. Multiple comparisons were carried out for saponin content to evaluate the significant differences. Different letters, small and capital, and also letter combinations indicate significant differences among the *C. quinoa* genotypes. SEM is the standard error of the mean.

| Quinoa line | Mean     | SEM      | Group         |
|-------------|----------|----------|---------------|
| Cq-2        | 15.04301 | 0.086232 | a             |
| AZ-129      | 14.00729 | 0.252109 | ab            |
| AZ-52       | 13.25356 | 0.061921 | ab            |
| AZ-3        | 12.32097 | 0.188044 | abc           |
| AZ-11       | 11.80002 | 0.218069 | abcd          |
| AZ-51       | 11.60049 | 1.400407 | abcde         |
| AZ-25       | 11.32823 | 0.267662 | abcde         |
| AZ-29       | 10.48916 | 0.390508 | bcdef         |
| AZ-7        | 10.47728 | 0.617656 | bcdefg        |
| AZ-46       | 9.69409  | 0.112231 | cdefgh        |
| AZ-26       | 9.420545 | 0.310204 | cdefghi       |
| AZ-115      | 9.395139 | 0.332736 | cdefghij      |
| AZ-30       | 9.291495 | 0.285172 | cdefghijk     |
| AZ-4        | 9.249942 | 0.080017 | cdefghijkl    |
| AZ-15       | 8.906645 | 0.138964 | defghijklm    |
| AZ-12       | 8.551772 | 0.30433  | efghijklmn    |
| AZ-111      | 8.376476 | 0.340058 | fghijklmno    |
| AZ-113      | 8.357189 | 0.150995 | fghijklmno    |
| AZ-67       | 8.289419 | 0.564337 | fghijklmnop   |
| AZ-27       | 8.143056 | 0.025349 | fghijklmnopq  |
| AZ-34       | 8.111276 | 0.394906 | fghijklmnopqr |

---

|        |          |          |                    |
|--------|----------|----------|--------------------|
| AZ-35  | 8.093954 | 0.074104 | fghijklmnopqr      |
| AZ-114 | 8.053523 | 0.127838 | fghijklmnopqr      |
| AZ-68  | 7.859489 | 0.077819 | fghijklmnopqrs     |
| AZ-9   | 7.794394 | 0.274427 | fghijklmnopqrs     |
| AZ-88  | 7.706565 | 0.122289 | ghijklmnopqrst     |
| AZ-104 | 7.696932 | 0.418045 | hijklmnopqrstu     |
| AZ-108 | 7.67239  | 0.12883  | hijklmnopqrstu     |
| AZ-107 | 7.593334 | 0.201926 | hijklmnopqrstuv    |
| AZ-8   | 7.417461 | 0.840902 | hijklmnopqrstuvw   |
| AZ-50  | 7.144627 | 0.092807 | hijklmnopqrstuvw   |
| AZ-16  | 7.143619 | 0.164276 | hijklmnopqrstuvw   |
| AZ-63  | 7.06801  | 0.032752 | ijklmnopqrstuvwxy  |
| AZ-36  | 6.95475  | 0.300665 | ijklmnopqrstuvwxy  |
| AZ-37  | 6.911229 | 0.060711 | ijklmnopqrstuvwxyA |
| AZ-80  | 6.908392 | 0.255224 | ijklmnopqrstuvwxyA |
| AZ-49  | 6.88429  | 0.285424 | klmnopqrstuvwxyA   |
| AZ-65  | 6.87419  | 0.255177 | klmnopqrstuvwxyA   |
| AZ-39  | 6.854671 | 0.05834  | klmnopqrstuvwxyA   |
| AZ-21  | 6.803673 | 0.051158 | lmnopqrstuvwxyAB   |
| AZ-98  | 6.792033 | 0.253215 | mnopqrstuvwxyAB    |
| AZ-14  | 6.7416   | 0.083743 | mnopqrstuvwxyAB    |
| AZ-81  | 6.732861 | 0.259839 | mnopqrstuvwxyAB    |
| AZ-20  | 6.722011 | 0.194301 | mnopqrstuvwxyAB    |
| AZ-47  | 6.719652 | 0.224148 | mnopqrstuvwxyAB    |
| AZ-71  | 6.547472 | 0.063668 | mnopqrstuvwxyABC   |
| AZ-72  | 6.503511 | 0.081821 | nopqrstuvwxyABC    |
| AZ-48  | 6.496443 | 0.084155 | nopqrstuvwxyABC    |
| Cq-1   | 6.496403 | 0.382012 | nopqrstuvwxyABC    |
| AZ-60  | 6.425009 | 0.050915 | nopqrstuvwxyABC    |
| AZ-19  | 6.358073 | 0.128722 | nopqrstuvwxyABC    |
| AZ-61  | 6.355868 | 0.124868 | nopqrstuvwxyABC    |
| AZ-44  | 6.353282 | 0.029387 | nopqrstuvwxyABC    |
| AZ-110 | 6.347593 | 0.229898 | nopqrstuvwxyABC    |
| AZ-89  | 6.335284 | 0.46285  | nopqrstuvwxyABC    |
| AZ-59  | 6.256078 | 0.059655 | nopqrstuvwxyABCD   |
| AZ-76  | 6.240691 | 0.219323 | opqrstuvwxyABCDE   |
| AZ-41  | 6.153331 | 0.181129 | opqrstuvwxyABCDE   |
| AZ-93  | 6.070646 | 0.103154 | pqrstuvwxyABCDEF   |
| AZ-22  | 6.031523 | 0.295852 | qrstuvwxyABCDEFG   |
| AZ-96  | 5.931692 | 0.147417 | rstuvwxyABCDEFGH   |
| AZ-13  | 5.867038 | 0.160573 | stuvwxyABCDEFGH    |
| AZ-33  | 5.858072 | 0.068394 | stuvwxyABCDEFGH    |
| AZ-66  | 5.820114 | 0.117219 | stuvwxyABCDEFGH    |
| AZ-94  | 5.818776 | 0.055331 | stuvwxyABCDEFGH    |
| AZ-58  | 5.63775  | 0.03063  | tuvwxyABCDEFGHI    |
| AZ-95  | 5.629688 | 0.034352 | tuvwxyABCDEFGHI    |

---

|        |          |          |                |
|--------|----------|----------|----------------|
| AZ-83  | 5.623982 | 0.249076 | uvwxyzABCDEFGH |
| AZ-55  | 5.619375 | 0.07892  | uvwxyzABCDEFGH |
| AZ-45  | 5.594212 | 0.178042 | vwxyzABCDEFGH  |
| AZ-1   | 5.564102 | 0.120019 | vwxyzABCDEFGH  |
| AZ-6   | 5.548225 | 0.473392 | wxyzABCDEFGH   |
| AZ-97  | 5.542161 | 0.110766 | vwxyzABCDEFGH  |
| AZ-56  | 5.517579 | 0.126249 | wxyzABCDEFGH   |
| AZ-73  | 5.472562 | 0.080749 | wxyzABCDEFGH   |
| AZ-32  | 5.464922 | 0.179211 | wxyzABCDEFGH   |
| AZ-24  | 5.45157  | 0.177634 | wxyzABCDEFGH   |
| AZ-5   | 5.413386 | 0.36931  | wxyzABCDEFGH   |
| AZ-69  | 5.404513 | 0.103478 | wxyzABCDEFGH   |
| AZ-42  | 5.380049 | 0.145934 | wxyzABCDEFGH   |
| AZ-112 | 5.358347 | 0.062768 | wxyzABCDEFGH   |
| AZ-62  | 5.358176 | 0.086516 | wxyzABCDEFGH   |
| AZ-91  | 5.357895 | 0.082795 | wxyzABCDEFGH   |
| AZ-77  | 5.341052 | 0.133745 | wxyzABCDEFGH   |
| AZ-23  | 5.333431 | 0.164121 | wxyzABCDEFGH   |
| AZ-105 | 5.308893 | 0.580436 | xyzABCDEFGHIJK |
| AZ-18  | 5.237719 | 0.116556 | xyzABCDEFGHIJK |
| AZ-31  | 5.208501 | 0.092832 | xyzABCDEFGHIJK |
| AZ-53  | 5.196108 | 0.088562 | xyzABCDEFGHIJK |
| AZ-54  | 5.167534 | 0.092352 | yzABCDEFGHIJK  |
| AZ-74  | 5.166952 | 0.134722 | yzABCDEFGHIJK  |
| AZ-85  | 5.123988 | 0.102174 | zABCDEFGHIJK   |
| AZ-87  | 5.038159 | 0.062303 | zABCDEFGHIJK   |
| AZ-40  | 5.019057 | 0.062891 | ABCDEFGHIJK    |
| AZ-70  | 4.940577 | 0.084208 | BCDEFGHIJK     |
| AZ-84  | 4.825833 | 0.461347 | CDEFGHIJK      |
| AZ-38  | 4.819712 | 0.055706 | CDEFGHIJK      |
| AZ-10  | 4.7871   | 0.179095 | CDEFGHIJK      |
| AZ-86  | 4.745504 | 0.068888 | CDEFGHIJK      |
| AZ-79  | 4.73064  | 0.892351 | DEFGHIJK       |
| AZ-43  | 4.525911 | 0.206006 | EFGHIJK        |
| AZ-78  | 4.503585 | 0.096793 | EFGHIJK        |
| AZ-17  | 4.426341 | 0.090418 | FGHIJK         |
| AZ-82  | 4.362027 | 0.041832 | GHIJK          |
| AZ-99  | 4.337887 | 0.372339 | HIJK           |
| AZ-103 | 4.088792 | 0.219066 | IJK            |
| AZ-57  | 3.92793  | 0.093483 | JKL            |
| AZ-101 | 3.781978 | 0.273797 | KL             |
| AZ-102 | 2.858134 | 0.10683  | L              |
| Cq-3   | 0.219794 | 0.003195 | M              |

---

**Table S3.** Variance by genotypic effect. Variance explained by genotypic effect (Vg) was calculated according to the restricted maximum likelihood (REML) variance components. The table shows the significant genotypic effect represented by Vg, and the existence of genetic diversity is up to 94.5% within the tested population for saponin content. Mu and Sigma are the mean and the standard deviation of each variable. OA: oleanolic acid, HD: hederagenin, PA: phytolaccagenic acid.

| Trait | Mu       | Sigma    | Min      | Max      | Vg     |
|-------|----------|----------|----------|----------|--------|
| OA    | 2.184332 | 0.851878 | 0.119811 | 5.228009 | 95.526 |
| HD    | 1.875622 | 0.690553 | 0.053093 | 4.182189 | 95.76  |
| PA    | 2.626221 | 1.252596 | 0        | 7.874068 | 97.476 |
| TS    | 6.686175 | 2.291514 | 0.214159 | 15.19523 | 94.561 |
